# Supplementary material for: Halophyte Plants Cultured in Aquaponics Hold the Same Potential for Valorization as Wild Conspecifics from Donor Sites
Source: MDPI journal article supplement (doi:10.3390/app112411586), 2021-12-07
Supplement: s1 [file s1]

## Supplementary material

**Table S1.** Concentration of dissolved inorganic phosphorous (DIP) and dissolved inorganic nitrogen (DIN) along the experimental period in *H. portulacoides* aquaponics tank system, *S. ramosissima* aquaponics tank system and *S. perennis* aquaponics tank system.

| Halophytes              | Aquaponics tank | Parameter                 | Spring        | Summer        | Autumn        |
|-------------------------|-----------------|---------------------------|---------------|---------------|---------------|
| <i>H. portulacoides</i> | Effluent inlet  | DIP (mg L <sup>-1</sup> ) | 0.078 ± 0.002 | 0.131 ± 0.002 | 0.433 ± 0.002 |
|                         | Effluent outlet |                           | 0.054 ± 0.007 | 0.461 ± 0.008 | 0.495 ± 0.008 |
|                         | Effluent inlet  | DIN (mg L <sup>-1</sup> ) | 0.847 ± 0.002 | 4.902 ± 0.001 | 8.315 ± 0.002 |
|                         | Effluent outlet |                           | 0.739 ± 0.002 | 0.461 ± 0.001 | 3.455 ± 0.001 |
| <i>S. ramosissima</i>   | Effluent inlet  | DIP (mg L <sup>-1</sup> ) | 0.090 ± 0.003 | 0.445 ± 0.001 | 0.443 ± 0.027 |
|                         | Effluent outlet |                           | 0.096 ± 0.005 | 0.520 ± 0.006 | 0.513 ± 0.010 |
|                         | Effluent inlet  | DIN (mg L <sup>-1</sup> ) | 0.869 ± 0.002 | 4.736 ± 0.001 | 8.096 ± 0.003 |
|                         | Effluent outlet |                           | 0.766 ± 0.004 | 0.514 ± 0.001 | 6.371 ± 0.003 |
| <i>S. perennis</i>      | Effluent inlet  | DIP (mg L <sup>-1</sup> ) | 0.084 ± 0.005 | 0.312 ± 0.002 | 0.462 ± 0.015 |
|                         | Effluent outlet |                           | 0.042 ± 0.001 | 0.380 ± 0.011 | 0.474 ± 0.004 |
|                         | Effluent inlet  | DIN (mg L <sup>-1</sup> ) | 0.754 ± 0.001 | 4.543 ± 0.003 | 8.225 ± 0.002 |
|                         | Effluent outlet |                           | 0.359 ± 0.017 | 0.085 ± 0.001 | 3.250 ± 0.001 |

**Table S2.** Fatty acid profile (percentage of relative abundance) of wild *H. portulacoides* in edible plant part and roots biomass in spring, summer and autumn. Values are averages 3 replicates  $\pm$  standard deviation. ND: fatty acid not detected. Saturated fatty acids (SFA): 16:0; 18:0; 20:0; 22:0; 24:0. Monounsaturated fatty acids (MUFA): 16:1*n*-7; 16:1*n*-9; 18:1*n*-9; 18:1*n*-7; 20:1*n*-7. Polyunsaturated fatty acids (PUFA): 16:3*n*-3; 18:2*n*-6; 18:3*n*-3; 20:2*n*-6.

| Fatty acids      | Wild              |                  |                  |                  |                  |                  |
|------------------|-------------------|------------------|------------------|------------------|------------------|------------------|
|                  | Edible plant part |                  |                  | Root             |                  |                  |
|                  | Spring            | Summer           | Autumn           | Spring           | Summer           | Autumn           |
| 16:0             | 17.57 $\pm$ 0.08  | 17.30 $\pm$ 0.58 | 15.37 $\pm$ 0.08 | 20.35 $\pm$ 0.09 | 19.32 $\pm$ 0.83 | 19.61 $\pm$ 0.11 |
| 18:0             | 1.23 $\pm$ 0.04   | 1.26 $\pm$ 0.04  | 0.99 $\pm$ 0.01  | 1.34 $\pm$ 0.25  | 1.19 $\pm$ 0.10  | 1.61 $\pm$ 0.19  |
| 20:0             | 0.63 $\pm$ 0.02   | 1.16 $\pm$ 0.01  | 0.93 $\pm$ 0.03  | 2.89 $\pm$ 0.04  | 2.96 $\pm$ 0.31  | 2.73 $\pm$ 0.05  |
| 22:0             | 1.25 $\pm$ 0.08   | 2.81 $\pm$ 0.03  | 2.87 $\pm$ 0.13  | 6.37 $\pm$ 0.26  | 11.06 $\pm$ 1.51 | 10.72 $\pm$ 0.25 |
| 24:0             | 3.38 $\pm$ 0.18   | 8.91 $\pm$ 0.51  | 11.72 $\pm$ 0.44 | 3.73 $\pm$ 0.47  | 5.34 $\pm$ 0.84  | 4.84 $\pm$ 0.24  |
| $\Sigma$ SFA     | 24.29 $\pm$ 0.20  | 31.62 $\pm$ 0.30 | 32.05 $\pm$ 0.50 | 34.68 $\pm$ 1.09 | 39.87 $\pm$ 1.73 | 39.51 $\pm$ 0.28 |
| 16:1 <i>n</i> -7 | ND                | ND               | ND               | 0.93 $\pm$ 0.11  | 2.08 $\pm$ 0.39  | 0.62 $\pm$ 0.03  |
| 16:1 <i>n</i> -9 | 1.39 $\pm$ 0.01   | 0.85 $\pm$ 0.03  | 1.20 $\pm$ 0.01  | ND               | ND               | ND               |
| 18:1 <i>n</i> -9 | 9.38 $\pm$ 0.06   | 11.46 $\pm$ 2.09 | 6.81 $\pm$ 0.10  | 12.20 $\pm$ 0.14 | 12.92 $\pm$ 0.23 | 11.22 $\pm$ 0.13 |
| 18:1 <i>n</i> -7 | 0.58 $\pm$ 0.01   | 0.79 $\pm$ 0.03  | 0.52 $\pm$ 0.01  | 1.23 $\pm$ 0.00  | 3.75 $\pm$ 0.57  | 1.29 $\pm$ 0.05  |
| 20:1 <i>n</i> -7 | 0.43 $\pm$ 0.00   | 0.58 $\pm$ 0.02  | 0.43 $\pm$ 0.02  | ND               | ND               | ND               |
| $\Sigma$ MUFA    | 11.78 $\pm$ 0.06  | 13.68 $\pm$ 2.05 | 8.95 $\pm$ 0.09  | 14.36 $\pm$ 0.25 | 18.75 $\pm$ 1.18 | 13.14 $\pm$ 0.20 |
| 16:3 <i>n</i> -3 | 2.03 $\pm$ 0.02   | 0.89 $\pm$ 0.04  | 1.22 $\pm$ 0.01  | ND               | ND               | ND               |
| 18:2 <i>n</i> -6 | 17.34 $\pm$ 0.08  | 14.38 $\pm$ 0.46 | 15.35 $\pm$ 0.18 | 41.10 $\pm$ 0.74 | 35.51 $\pm$ 0.23 | 40.69 $\pm$ 0.29 |
| 18:3 <i>n</i> -3 | 43.67 $\pm$ 0.03  | 36.75 $\pm$ 1.31 | 40.86 $\pm$ 0.36 | 9.85 $\pm$ 0.12  | 5.87 $\pm$ 0.32  | 6.66 $\pm$ 0.07  |
| 20:2 <i>n</i> -6 | 0.89 $\pm$ 0.08   | 2.68 $\pm$ 0.16  | 1.57 $\pm$ 0.14  | ND               | ND               | ND               |
| $\Sigma$ PUFA    | 63.93 $\pm$ 0.14  | 54.7 $\pm$ 1.91  | 58.99 $\pm$ 0.42 | 50.95 $\pm$ 0.84 | 41.38 $\pm$ 0.55 | 47.35 $\pm$ 0.32 |

**Table S3.** Fatty acid profile (percentage of relative abundance) of aquaponics *H. portulacoides* in edible plant part and roots biomass in spring, summer and autumn. Values are averages 3 replicates  $\pm$  standard deviation. ND: fatty acid not detected. Saturated fatty acids (SFA): 16:0; 18:0; 20:0; 22:0; 24:0. Monounsaturated fatty acids (MUFA): 16:1*n*-7; 16:1*n*-9; 18:1*n*-9; 18:1*n*-7; 20:1*n*-7. Polyunsaturated fatty acids (PUFA): 16:3*n*-3; 18:2*n*-6; 18:3*n*-3; 20:2*n*-6.

| Fatty acids      | Aquaponics        |                  |                  |                  |                  |                  |
|------------------|-------------------|------------------|------------------|------------------|------------------|------------------|
|                  | Edible plant part |                  |                  | Root             |                  |                  |
|                  | Spring            | Summer           | Autumn           | Spring           | Summer           | Autumn           |
| 16:0             | 15.49 $\pm$ 0.14  | 16.05 $\pm$ 0.05 | 15.75 $\pm$ 0.10 | 26.31 $\pm$ 0.19 | 23.24 $\pm$ 0.21 | 22.50 $\pm$ 0.08 |
| 18:0             | 0.87 $\pm$ 0.01   | 1.00 $\pm$ 0.02  | 1.03 $\pm$ 0.00  | 1.21 $\pm$ 0.05  | 1.26 $\pm$ 0.05  | 1.34 $\pm$ 0.02  |
| 20:0             | 0.54 $\pm$ 0.01   | 0.52 $\pm$ 0.01  | 0.72 $\pm$ 0.01  | 0.70 $\pm$ 0.01  | 0.80 $\pm$ 0.03  | 1.33 $\pm$ 0.02  |
| 22:0             | 1.06 $\pm$ 0.02   | 1.39 $\pm$ 0.06  | 2.24 $\pm$ 0.04  | 2.65 $\pm$ 0.08  | 3.35 $\pm$ 0.16  | 4.22 $\pm$ 0.07  |
| 24:0             | 3.29 $\pm$ 0.30   | 3.49 $\pm$ 0.60  | 4.98 $\pm$ 0.23  | 2.76 $\pm$ 0.06  | 2.12 $\pm$ 0.07  | 3.15 $\pm$ 0.06  |
| $\Sigma$ SFA     | 21.25 $\pm$ 0.18  | 22.45 $\pm$ 0.58 | 24.72 $\pm$ 0.08 | 33.63 $\pm$ 0.27 | 30.87 $\pm$ 0.30 | 32.54 $\pm$ 0.17 |
| 16:1 <i>n</i> -7 | ND                | ND               | ND               | 1.37 $\pm$ 0.08  | 20.20 $\pm$ 0.63 | 8.57 $\pm$ 0.03  |
| 16:1 <i>n</i> -9 | 1.44 $\pm$ 0.01   | 1.35 $\pm$ 0.03  | 1.08 $\pm$ 0.01  | ND               | ND               | ND               |
| 18:1 <i>n</i> -9 | 6.67 $\pm$ 0.06   | 7.54 $\pm$ 0.04  | 7.09 $\pm$ 0.00  | 5.51 $\pm$ 0.09  | 7.09 $\pm$ 0.06  | 8.84 $\pm$ 0.18  |
| 18:1 <i>n</i> -7 | 0.26 $\pm$ 0.01   | 0.41 $\pm$ 0.01  | 0.51 $\pm$ 0.00  | 1.29 $\pm$ 0.05  | 7.87 $\pm$ 0.13  | 3.81 $\pm$ 0.14  |
| 20:1 <i>n</i> -7 | 0.45 $\pm$ 0.03   | 0.38 $\pm$ 0.01  | 0.43 $\pm$ 0.00  | ND               | ND               | ND               |
| $\Sigma$ MUFA    | 8.82 $\pm$ 0.09   | 9.68 $\pm$ 0.07  | 9.11 $\pm$ 0.01  | 8.17 $\pm$ 0.18  | 35.16 $\pm$ 0.70 | 21.21 $\pm$ 0.29 |
| 16:3 <i>n</i> -3 | 3.41 $\pm$ 0.05   | 1.73 $\pm$ 0.03  | 1.23 $\pm$ 0.01  | ND               | ND               | ND               |
| 18:2 <i>n</i> -6 | 20.45 $\pm$ 0.12  | 16.84 $\pm$ 0.14 | 19.62 $\pm$ 0.04 | 50.95 $\pm$ 0.45 | 30.01 $\pm$ 0.67 | 38.28 $\pm$ 0.16 |
| 18:3 <i>n</i> -3 | 44.99 $\pm$ 0.23  | 48.64 $\pm$ 0.38 | 44.45 $\pm$ 0.03 | 7.25 $\pm$ 0.08  | 3.96 $\pm$ 0.12  | 7.96 $\pm$ 0.05  |

|                |              |              |              |              |              |              |
|----------------|--------------|--------------|--------------|--------------|--------------|--------------|
| <b>20:2n-6</b> | 1.08 ± 0.07  | 0.67 ± 0.04  | 0.86 ± 0.01  | ND           | ND           | ND           |
| <b>Σ PUFA</b>  | 69.93 ± 0.28 | 67.87 ± 0.52 | 66.17 ± 0.07 | 58.20 ± 0.41 | 33.97 ± 0.80 | 46.24 ± 0.20 |

**Table S4.** Fatty acid profile (percentage of relative abundance) of wild *S. ramosissima* in edible plant part and roots biomass in spring, summer and autumn. Values are averages 3 replicates ± standard deviation. ND: fatty acid not detected. Saturated fatty acids (SFA): 16:0; 18:0; 20:0; 22:0; 24:0. Monounsaturated fatty acids (MUFA): 16:1n-7; 16:1n-9; 18:1n-9; 18:1n-7; 20:1n-7. Polyunsaturated fatty acids (PUFA): 18:2n-6; 18:3n-3; 20:2n-6.

| Fatty acids    | Wild              |              |              |              |              |              |
|----------------|-------------------|--------------|--------------|--------------|--------------|--------------|
|                | Edible plant part |              |              | Root         |              |              |
|                | Spring            | Summer       | Autumn       | Spring       | Summer       | Autumn       |
| <b>16:0</b>    | 18.79 ± 0.05      | 18.21 ± 0.12 | 18.69 ± 0.05 | 26.58 ± 0.10 | 25.14 ± 0.16 | 21.83 ± 0.32 |
| <b>18:0</b>    | 1.73 ± 0.02       | 1.47 ± 0.02  | 1.10 ± 0.02  | 1.04 ± 0.01  | 1.25 ± 0.06  | 1.08 ± 0.04  |
| <b>20:0</b>    | 0.57 ± 0.01       | 0.55 ± 0.01  | 0.56 ± 0.00  | ND           | ND           | ND           |
| <b>22:0</b>    | 0.62 ± 0.01       | 0.72 ± 0.01  | 1.76 ± 0.01  | 3.19 ± 0.08  | 3.81 ± 0.10  | 4.95 ± 0.28  |
| <b>24:0</b>    | 1.36 ± 0.02       | 1.75 ± 0.02  | 2.17 ± 0.03  | 4.71 ± 0.24  | 7.18 ± 0.30  | 8.62 ± 0.96  |
| <b>Σ SFA</b>   | 23.07 ± 0.02      | 22.71 ± 0.15 | 24.27 ± 0.08 | 35.52 ± 0.25 | 37.38 ± 0.08 | 36.48 ± 0.96 |
| <b>16:1n-7</b> | ND                | ND           | ND           | 0.64 ± 0.02  | 0.57 ± 0.01  | 0.50 ± 0.06  |
| <b>16:1n-9</b> | 1.59 ± 0.03       | 2.30 ± 0.02  | 1.46 ± 0.00  | ND           | ND           | ND           |
| <b>18:1n-9</b> | 2.04 ± 0.01       | 1.44 ± 0.00  | 2.68 ± 0.03  | 3.22 ± 0.03  | 3.00 ± 0.01  | 3.13 ± 0.19  |
| <b>18:1n-7</b> | 0.29 ± 0.01       | 0.26 ± 0.01  | 0.77 ± 0.02  | 0.80 ± 0.03  | 0.76 ± 0.01  | 1.24 ± 0.38  |
| <b>20:1n-7</b> | 0.15 ± 0.01       | 0.14 ± 0.00  | 0.43 ± 0.01  | ND           | ND           | ND           |
| <b>Σ MUFA</b>  | 4.07 ± 0.03       | 4.14 ± 0.01  | 5.34 ± 0.05  | 4.66 ± 0.05  | 4.33 ± 0.02  | 4.876 ± 0.15 |
| <b>18:2n-6</b> | 23.24 ± 0.11      | 22.83 ± 0.22 | 32.93 ± 0.02 | 52.42 ± 0.25 | 50.98 ± 0.06 | 48.95 ± 0.88 |
| <b>18:3n-3</b> | 49.46 ± 0.11      | 50.15 ± 0.37 | 36.96 ± 0.03 | 7.40 ± 0.04  | 7.32 ± 0.03  | 9.70 ± 0.22  |
| <b>20:2n-6</b> | 0.16 ± 0.00       | 0.18 ± 0.00  | 0.51 ± 0.02  | ND           | ND           | ND           |
| <b>Σ PUFA</b>  | 72.86 ± 0.01      | 73.15 ± 0.19 | 70.39 ± 0.03 | 59.82 ± 0.27 | 58.29 ± 0.06 | 58.65 ± 0.10 |

**Table S5.** Fatty acid profile (percentage of relative abundance) of aquaponics *S. ramosissima* in edible plant part and roots biomass in spring, summer and autumn. Values are averages 3 replicates ± standard deviation. ND: fatty acid not detected. Saturated fatty acids (SFA): 16:0; 18:0; 20:0; 22:0; 24:0. Monounsaturated fatty acids (MUFA): 16:1n-7; 16:1n-9; 18:1n-9; 18:1n-7; 20:1n-7. Polyunsaturated fatty acids (PUFA): 18:2n-6; 18:3n-3; 20:2n-6.

| Fatty acids      | Aquaponics        |              |              |              |              |              |
|------------------|-------------------|--------------|--------------|--------------|--------------|--------------|
|                  | Edible plant part |              |              | Root         |              |              |
|                  | Spring            | Summer       | Autumn       | Spring       | Summer       | Autumn       |
| 16:0             | 18.11 ± 0.13      | 16.78 ± 0.06 | 19.57 ± 0.10 | 26.93 ± 0.09 | 32.88 ± 0.24 | 25.89 ± 0.13 |
| 18:0             | 1.97 ± 0.07       | 2.20 ± 0.02  | 1.71 ± 0.01  | 1.15 ± 0.09  | 1.94 ± 0.07  | 1.82 ± 0.09  |
| 20:0             | 0.71 ± 0.00       | 0.66 ± 0.00  | 0.71 ± 0.01  | 1.40 ± 0.04  | 1.54 ± 0.04  | 2.12 ± 0.02  |
| 22:0             | 1.11 ± 0.00       | 0.82 ± 0.00  | 1.45 ± 0.00  | 2.72 ± 0.07  | 3.16 ± 0.09  | 4.50 ± 0.03  |
| 24:0             | 1.88 ± 0.01       | 1.53 ± 0.02  | 2.21 ± 0.00  | 4.99 ± 0.34  | 4.55 ± 0.09  | 4.69 ± 0.03  |
| Σ SFA            | 23.77 ± 0.16      | 21.99 ± 0.06 | 25.66 ± 0.08 | 37.19 ± 0.45 | 44.07 ± 0.53 | 39.02 ± 0.15 |
| 16:1 <i>n</i> -7 | ND                | ND           | ND           | 1.98 ± 0.06  | 13.44 ± 0.27 | 4.47 ± 0.04  |
| 16:1 <i>n</i> -9 | 1.86 ± 0.01       | 0.75 ± 0.02  | 1.05 ± 0.02  | ND           | ND           | ND           |
| 18:1 <i>n</i> -9 | 1.54 ± 0.01       | 1.53 ± 0.00  | 2.17 ± 0.04  | 1.73 ± 0.09  | 3.29 ± 0.01  | 5.74 ± 0.01  |
| 18:1 <i>n</i> -7 | 0.36 ± 0.00       | 0.19 ± 0.01  | 0.23 ± 0.03  | 2.34 ± 0.07  | 7.65 ± 0.11  | 3.90 ± 0.02  |
| 20:1 <i>n</i> -7 | 0.14 ± 0.00       | 0.10 ± 0.01  | 0.32 ± 0.01  | ND           | ND           | ND           |
| Σ MUFA           | 3.91 ± 0.01       | 2.58 ± 0.01  | 3.77 ± 0.07  | 6.06 ± 0.22  | 24.38 ± 0.37 | 14.12 ± 0.05 |
| 18:2 <i>n</i> -6 | 27.28 ± 0.03      | 19.71 ± 0.02 | 32.31 ± 0.15 | 47.41 ± 0.57 | 26.85 ± 0.15 | 38.03 ± 0.13 |
| 18:3 <i>n</i> -3 | 44.80 ± 0.15      | 55.57 ± 0.04 | 37.78 ± 0.18 | 9.34 ± 0.09  | 4.71 ± 0.06  | 8.83 ± 0.06  |
| 20:2 <i>n</i> -6 | 0.25 ± 0.00       | 0.16 ± 0.01  | 0.49 ± 0.01  | ND           | ND           | ND           |
| Σ PUFA           | 72.33 ± 0.15      | 75.43 ± 0.06 | 70.57 ± 0.04 | 56.75 ± 0.67 | 31.55 ± 0.21 | 46.86 ± 0.19 |

**Table S6.** Fatty acid profile (percentage of relative abundance) of wild *S. perennis* in edible plant part and roots biomass in spring, summer and autumn. Values are averages 3 replicates ± standard deviation. ND: fatty acid not detected. Saturated fatty acids (SFA): 16:0; 18:0; 20:0; 22:0; 24:0. Monounsaturated fatty acids (MUFA): 16:1*n*-7; 16:1*n*-9; 18:1*n*-9; 18:1*n*-7. Polyunsaturated fatty acids (PUFA): 18:2*n*-6; 18:3*n*-3.

| Fatty acids      | Wild              |              |              |              |              |              |
|------------------|-------------------|--------------|--------------|--------------|--------------|--------------|
|                  | Edible plant part |              |              | Root         |              |              |
|                  | Spring            | Summer       | Autumn       | Spring       | Summer       | Autumn       |
| 16:0             | 20.64 ± 0.06      | 20.54 ± 0.03 | 17.98 ± 0.32 | 19.03 ± 0.26 | 19.30 ± 0.14 | 15.80 ± 0.08 |
| 18:0             | 1.32 ± 0.06       | 1.41 ± 0.04  | 2.11 ± 0.05  | 1.44 ± 0.08  | 1.44 ± 0.05  | 1.27 ± 0.02  |
| 20:0             | 0.60 ± 0.01       | 0.65 ± 0.00  | 0.87 ± 0.02  | 4.01 ± 0.07  | 3.70 ± 0.18  | 4.13 ± 0.04  |
| 22:0             | 1.10 ± 0.02       | 1.09 ± 0.07  | 2.38 ± 0.04  | 7.52 ± 0.14  | 6.93 ± 0.11  | 9.85 ± 0.09  |
| 24:0             | 1.77 ± 0.04       | 1.71 ± 0.13  | 2.65 ± 0.06  | 10.38 ± 1.15 | 8.53 ± 0.58  | 15.52 ± 0.24 |
| Σ SFA            | 25.41 ± 0.16      | 25.41 ± 0.31 | 26.00 ± 0.30 | 42.38 ± 1.18 | 39.90 ± 0.71 | 46.57 ± 0.28 |
| 16:1 <i>n</i> -7 | ND                | ND           | ND           | ND           | ND           | ND           |
| 16:1 <i>n</i> -9 | 1.79 ± 0.01       | 1.97 ± 0.02  | 1.18 ± 0.01  | ND           | ND           | ND           |
| 18:1 <i>n</i> -9 | 3.50 ± 0.00       | 2.51 ± 0.03  | 7.68 ± 0.21  | 7.11 ± 0.13  | 9.78 ± 0.11  | 10.74 ± 0.03 |
| 18:1 <i>n</i> -7 | ND                | ND           | ND           | 1.28 ± 0.02  | 1.12 ± 0.02  | 1.68 ± 0.01  |
| Σ MUFA           | 5.29 ± 0.01       | 4.48 ± 0.01  | 8.86 ± 0.20  | 8.39 ± 0.15  | 10.90 ± 0.12 | 12.42 ± 0.03 |
| 18:2 <i>n</i> -6 | 24.24 ± 0.13      | 23.92 ± 0.13 | 42.25 ± 0.62 | 41.45 ± 0.92 | 40.13 ± 0.48 | 33.89 ± 0.27 |
| 18:3 <i>n</i> -3 | 45.06 ± 0.07      | 46.19 ± 0.44 | 22.89 ± 0.52 | 7.77 ± 0.11  | 9.07 ± 0.12  | 7.13 ± 0.01  |
| Σ PUFA           | 69.29 ± 0.17      | 70.11 ± 0.32 | 65.14 ± 0.12 | 49.22 ± 1.03 | 49.20 ± 0.59 | 41.02 ± 0.26 |

**Table S7.** Fatty acid profile (percentage of relative abundance) of aquaponics *S. perennis* in edible plant part and roots biomass in spring, summer and autumn. Values are averages 3 replicates ± standard deviation. ND: fatty acid not

detected. Saturated fatty acids (SFA): 16:0; 18:0; 20:0; 22:0; 24:0. Monounsaturated fatty acids (MUFA): 16:1*n*-7; 16:1*n*-9; 18:1*n*-9; 18:1*n*-7. Polyunsaturated fatty acids (PUFA): 18:2*n*-6; 18:3*n*-3.

| Fatty acids           | Aquaponics        |              |              |              |              |              |
|-----------------------|-------------------|--------------|--------------|--------------|--------------|--------------|
|                       | Edible plant part |              |              | Root         |              |              |
|                       | Spring            | Summer       | Autumn       | Spring       | Summer       | Autumn       |
| <b>16:0</b>           | 18.66 ± 0.13      | 19.14 ± 0.04 | 19.02 ± 0.16 | 24.39 ± 0.07 | 29.20 ± 0.09 | 26.91 ± 0.07 |
| <b>18:0</b>           | 1.36 ± 0.02       | 1.08 ± 0.02  | 1.04 ± 0.06  | 1.15 ± 0.02  | 1.53 ± 0.02  | 2.11 ± 0.02  |
| <b>20:0</b>           | 0.50 ± 0.01       | 0.44 ± 0.01  | 0.42 ± 0.10  | 1.52 ± 0.02  | 1.82 ± 0.01  | 1.66 ± 0.00  |
| <b>22:0</b>           | 0.72 ± 0.02       | 0.94 ± 0.01  | 0.89 ± 0.27  | 2.14 ± 0.03  | 3.30 ± 0.03  | 2.57 ± 0.01  |
| <b>24:0</b>           | 1.24 ± 0.06       | 1.18 ± 0.03  | 1.08 ± 0.27  | 3.46 ± 0.10  | 4.17 ± 0.02  | 2.42 ± 0.08  |
| <b>Σ SFA</b>          | 22.48 ± 0.05      | 22.79 ± 0.03 | 22.46 ± 0.82 | 32.66 ± 0.11 | 40.02 ± 0.08 | 35.67 ± 0.16 |
| <b>16:1<i>n</i>-7</b> | ND                | ND           | ND           | 0.49 ± 0.00  | 4.90 ± 0.07  | 14.33 ± 0.10 |
| <b>16:1<i>n</i>-9</b> | 0.85 ± 0.01       | 1.11 ± 0.00  | 1.64 ± 0.02  | ND           | ND           | ND           |
| <b>18:1<i>n</i>-9</b> | 4.05 ± 0.03       | 3.38 ± 0.01  | 2.77 ± 0.13  | 3.99 ± 0.02  | 4.85 ± 0.04  | 5.50 ± 0.01  |
| <b>18:1<i>n</i>-7</b> | ND                | ND           | ND           | 0.60 ± 0.01  | 3.69 ± 0.04  | 5.81 ± 0.01  |
| <b>Σ MUFA</b>         | 4.90 ± 0.03       | 4.49 ± 0.01  | 4.41 ± 0.15  | 5.08 ± 0.02  | 13.35 ± 0.07 | 25.64 ± 0.10 |
| <b>18:2<i>n</i>-6</b> | 20.57 ± 0.10      | 19.75 ± 0.05 | 23.05 ± 0.25 | 53.80 ± 0.09 | 40.67 ± 0.07 | 33.94 ± 0.06 |
| <b>18:3<i>n</i>-3</b> | 52.04 ± 0.18      | 52.97 ± 0.07 | 50.08 ± 1.03 | 8.46 ± 0.01  | 5.86 ± 0.03  | 4.75 ± 0.01  |
| <b>Σ PUFA</b>         | 72.61 ± 0.08      | 72.72 ± 0.03 | 73.13 ± 0.97 | 62.26 ± 0.10 | 46.53 ± 0.09 | 38.68 ± 0.07 |
